# Supplementary material for: Polypyrrole with a functionalized multi-walled carbon nanotube hybrid nanocomposite: a new and efficient nitrite sensor
Source: Royal Society of Chemistry journal article supplement (doi:10.1039/c7nj04130f), 2018-01-01
Supplement: c7nj04130f1.pdf [file c7nj04130f1.pdf]

## Polypyrrole with functionalized multi wall carbon nanotubes hybrid nanocomposite: A new and efficient nitrite sensor

Abraham Daniel Arulraj<sup>a</sup>, Sundaram Ellairaja<sup>b</sup>, Vairathevar Sivasamy Vasantha<sup>\*b</sup>, Bernaurdshaw Neppolian<sup>\*a</sup>

<sup>a</sup>SRM-Research Institute, SRM University, Kattankulathur, Chennai 603 203, India

<sup>b</sup>School of Chemistry, Madurai Kamaraj University, Madurai- 625 021, India

### Dispersibility of f-MWCNTs in water

Moreover, we found that the f-MWCNTs could be dispersed in the polar solvent like water more easily than as prepared raw MWCNTs. The dispersion of f-MWCNTs 0.1 mg/ml in water using probe type sonicator (SONICS® VCX750, supplied by Sonics & Materials, Inc.) are given in Fig. S1.

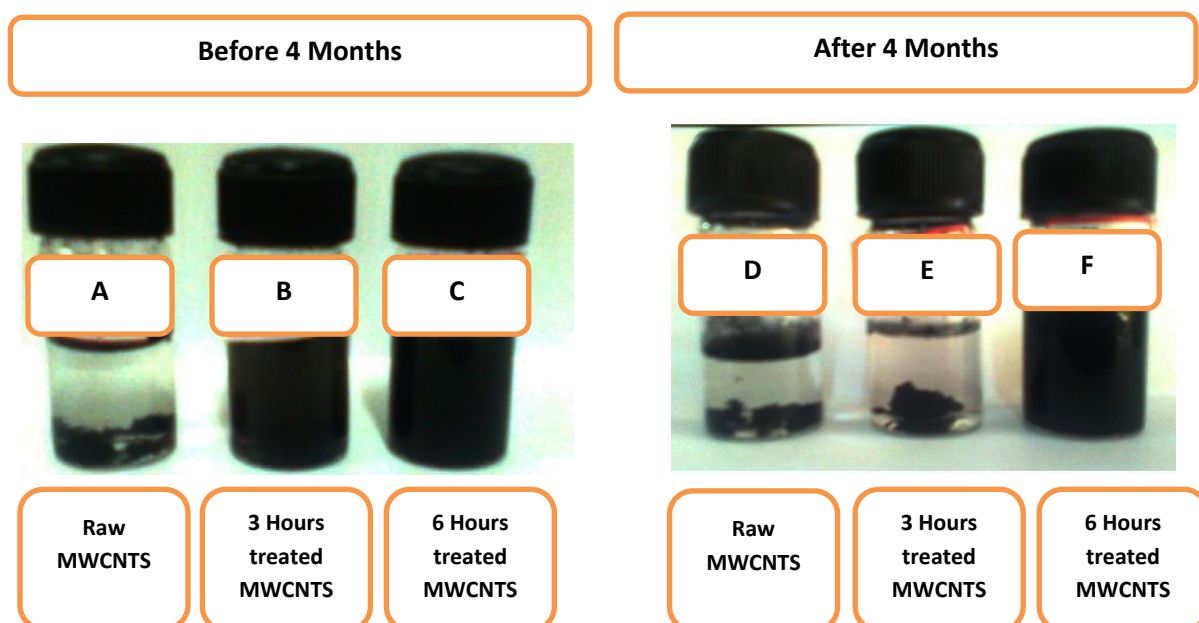

**Fig. S1.** Photographical images of raw MWCNTs and f-MWCNTs dispersed in water were taken immediately after dispersion (A, B, C). Photographical images of raw MWCNTs and f-MWCNTs dispersed in water taken after 4 months of dispersion (D, E, F).

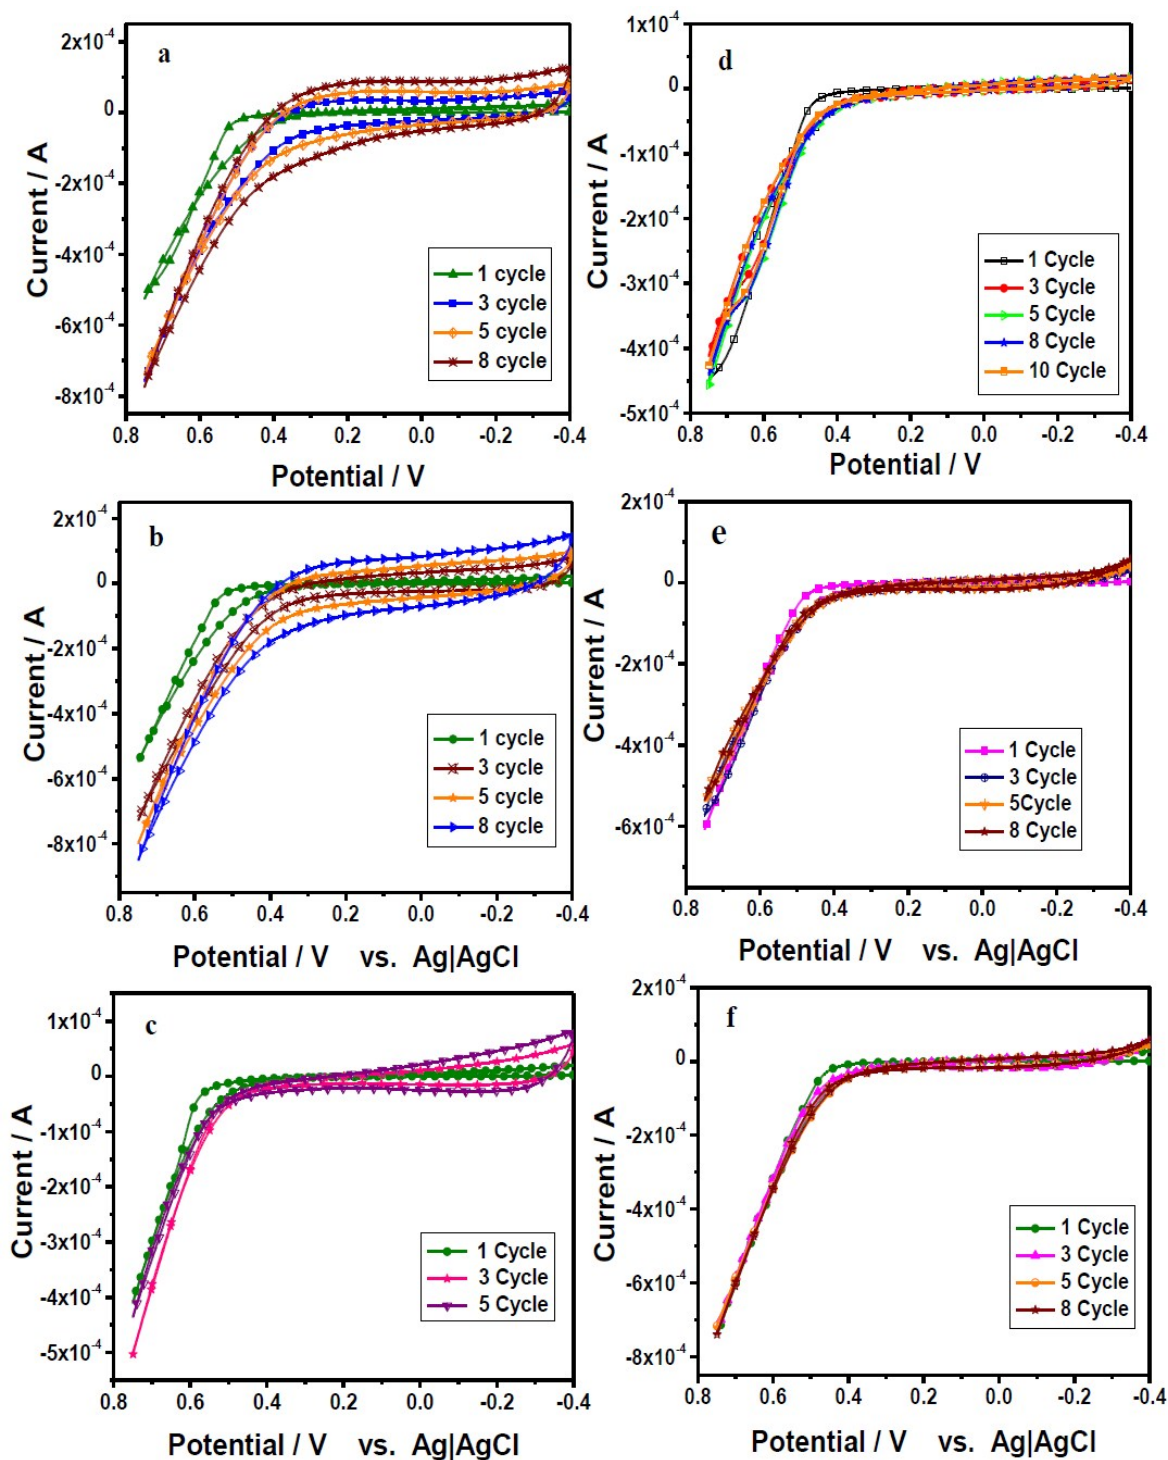

**Fig. S2.** Cyclic voltammograms recorded during the electrochemical polymerization of Pyrrole in the solution containing 0.1 M pyrrole and 0.05 M  $\text{LiClO}_4$  for 1, 3, 5 and 8 cycles with different concentrations of SDS such as 0.01 M (a), 0.02 M (b) and 0.03 M (c) in the presence of 0.1 % f-

MWCNTs and different concentrations of SDS 0.01 M (d), 0.02 M (e) and 0.03 M (f) in the absence of f-MWCNTs with: Scan rate 50 mV/s) [final polymerisation cycle only given].

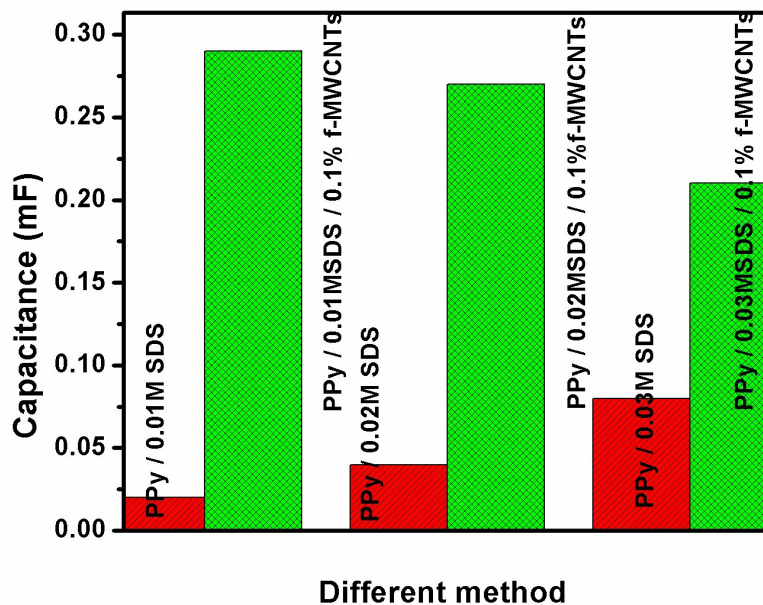

**Fig. S3.** Bar diagram of capacitance values calculated for PPy/SDS/f-MWCNTs and PPy/SDS composites obtained electrochemical polymerisation in solution containing 0.1 M Pyrrole + 0.05 M LiClO<sub>4</sub> + 0.1 % f-MWCNTs in the presence of different concentrations of SDS at 3 cycles of polymerization: 0.01 M SDS, 0.02 M SDS and 0.03 M SDS.

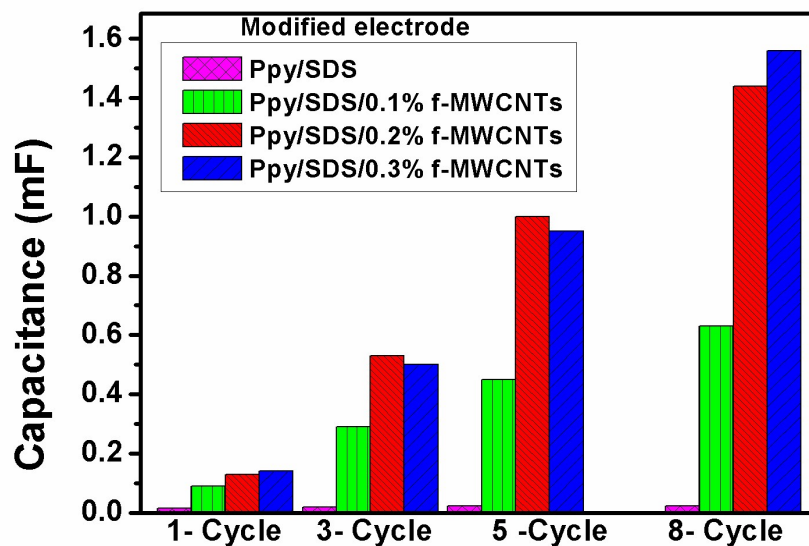

**Fig. S4.** Bar diagram of capacitance values calculated for PPy/SDS, PPy/SDS/0.1% f-MWCNTs, PPy/SDS/0.2% f-MWCNTs and PPy/SDS/0.3% f-MWCNTs films.

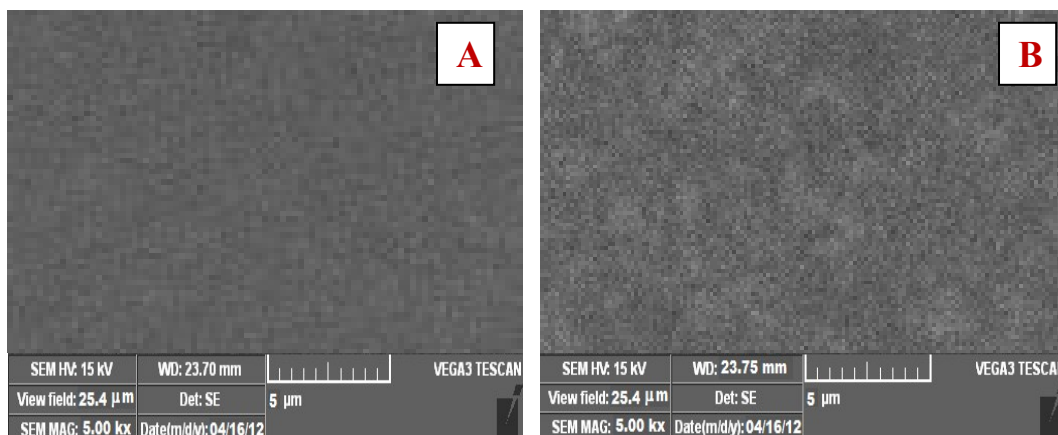

**Fig. S5.** SEM images of electrochemically deposited PPy (A) ITO electrode. (B) PPy at 1 cycle.

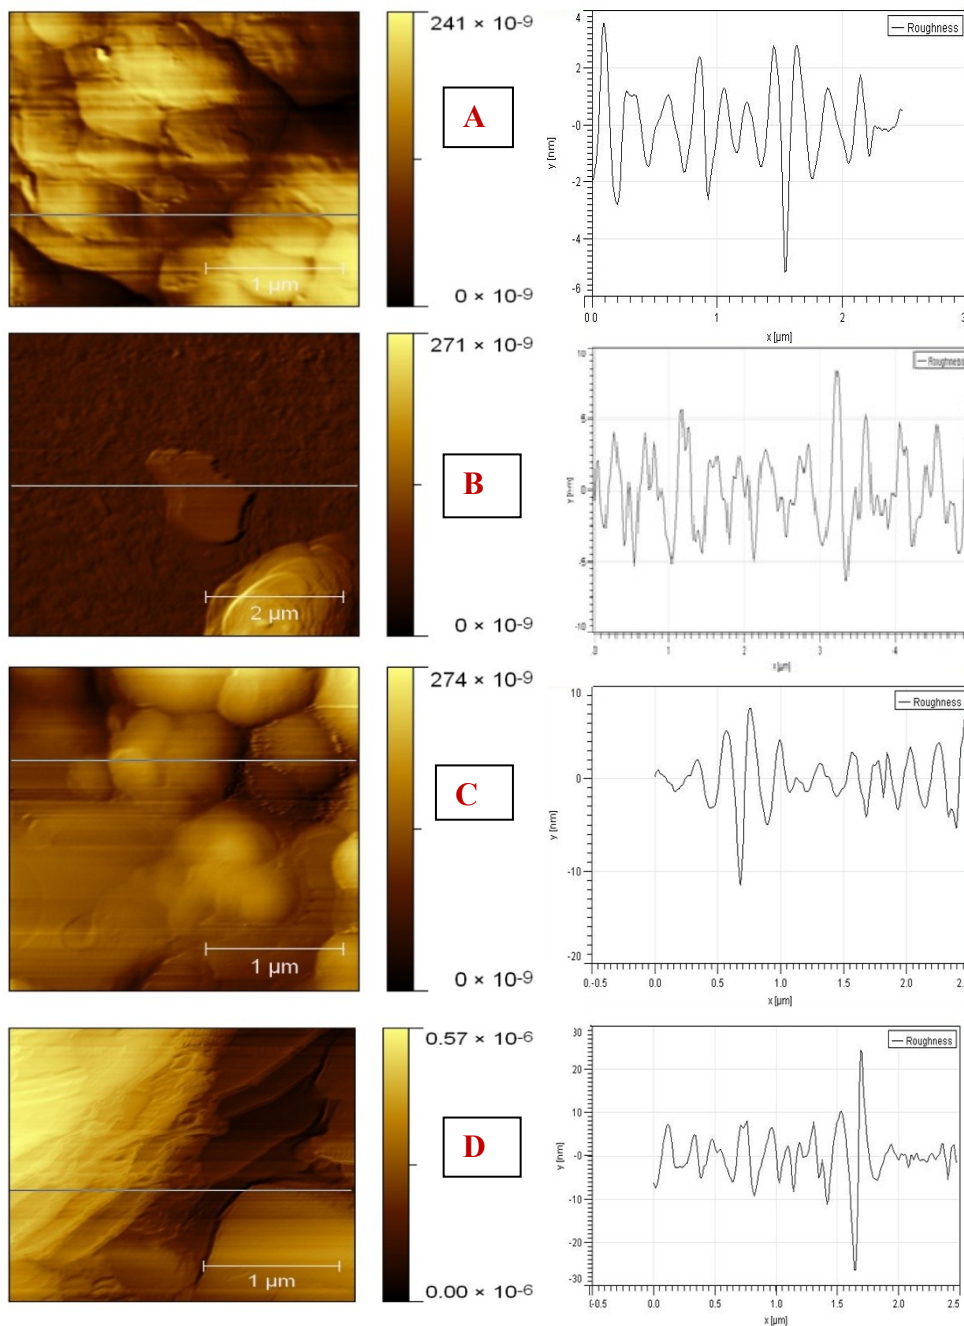

**Fig. S6.** AFM image and Roughness curve of PPy/SDS -3 cycle film - $2.5\ \mu\text{m}$  [A], PPy/SDS/0.1% f-MWCNTs- 3 cycle composite-  $5\ \mu\text{m}$  [B], PPy/SDS/0.2% f-MWCNTs- 3 cycle composite - $2.5\ \mu\text{m}$  [C], PPy/SDS/0.2% f-MWCNTs- 5 cycle composite - $2.5\ \mu\text{m}$  [D].

## AFM images of composite films and pure PPy films.

Fig. S6 shows the AFM images (A, B, C and D) of the PPy/SDS and PPy/SDS/f-MWCNTs composite films. The average value of roughness of the composite film increases with increasing the concentration of the f-MWCNTs in the film compare to PPy/SDS surface (A). Similarly, the average thickness of the composites increases with increasing the concentration of the f-MWCNTs was greater than for the reference PPy/SDS composite film. All the data derived from AFM images of the composite films are given in Table. S2.

**Table S1.** FT-IR spectral data and identification of functional groups of the f-MWCNTs samples prepared at different treatment time in acid solution.

| Treatment time (hour) |                  |                  | Functional group/assignment                        | Reference |
|-----------------------|------------------|------------------|----------------------------------------------------|-----------|
| 3 hours               | 6 hours          | 9 hours          |                                                    |           |
| cm <sup>-1</sup>      | cm <sup>-1</sup> | cm <sup>-1</sup> |                                                    |           |
| 3462                  | 3430             | 3422             | O-H stretching                                     | [1]       |
| 2920                  | 2924             | 2924             | C-H stretching in CH <sub>2</sub> group            | [2]       |
|                       |                  |                  | O-H stretching from strongly                       |           |
| 2359                  | 2382             | 2357             | hydrogen bonded COOH group                         | [3, 4]    |
| 1640                  | 1636             | 1645             | C=O stretching of carboxylate group                | [5, 6]    |
| 1383                  | 1385             | 1383             | C-OH Bending                                       | [7, 8]    |
| 1040                  | 1038             | 1036             | C-O stretching                                     | [9]       |
| -                     | 606              | 679              | C-H out of plane bending                           | [9]       |
| 1111                  | 1109             | -                | C-C-O ring stretching, C-C-C asymmetric stretching | [10]      |

## References

- 1 S. Mantha, V. A. Pedrosa, E. V. Olsen, V. A. Davis and A. L. Simonian, *Langmuir*, 2010, 26, 19114-19119.
- 2 T. Ramanathan, F. T. Fisher, R. S. Ruoff and L. C. Brinson. *Chem. Mater.*, 2005, 17, 1290-1295.
- 3 W. M. Davis, C. L. Erickson, C. T. Johnston, J. J. Delfino and J. E. Porter, *Chemosphere*, 1999, 38, 2913-2928.
- 4 P. Fischer, *The Arabian J. Sci. Eng.*, 2010, 35, 7-16
- 5 J. Orbulescu, C. A. Constantine, V. K. Rastogi, S. S. Shah, J. J. DeFrank and R. M. Leblanc, *Anal. Chem.*, 2006, 78, 7016-7021.
- 6 X. Huang, Y. Sun, L. Wang, F. Meng and J. Liu, *Nanotechnology*, 2004, 15, 1284-1288.
- 7 S. Kumar, I. Kaur, K. Dharamvir and L. M. Bharadwaj, *J. Coll. and Inter. Sci.*, 2012, 369, 23-27.
- 8 N. R. Raravikar, L. S. Schadler, A. Vijayaraghavan, Y. Zhao, B. Wei and P. M. Ajayan, *Chem. Mater.*, 2005, 17, 974-983.
- 9 R. M. Silverstein, F. X. Webster, *Spectrometric identification of organic compounds*, 6<sup>th</sup> edition. Dec 1996.
- 10 J. Jang, J. Bae, S. H. Yoon, *J. Mater. Chem.*, 2003, 13, 676-681.



**Table S2.** AFM data from the PPy/SDS, PPy/SDS/0.1% f-MWCNTs, PPy/SDS/0.2% f-MWCNTs composite films.

| <b>Data</b>                                  | <b>PPy/SDS<br/>3 cycle<br/>2.5 <math>\mu\text{m}</math></b> | <b>PPy/SDS/0.2%<br/>f-MWCNTs<br/>3 cycle<br/>2.5 <math>\mu\text{m}</math></b> | <b>PPy/SDS/0.2%<br/>f-MWCNTs<br/>5 cycle<br/>2.5 <math>\mu\text{m}</math></b> | <b>PPy/SDS/0.1%<br/>f-MWCNTs<br/>3 cycle<br/>5 <math>\mu\text{m}</math></b> |
|----------------------------------------------|-------------------------------------------------------------|-------------------------------------------------------------------------------|-------------------------------------------------------------------------------|-----------------------------------------------------------------------------|
| Roughness average (nm)                       | 1.1                                                         | 2.1                                                                           | 3.9                                                                           | 2.2                                                                         |
| Root mean square roughness (nm)              | 1.4                                                         | 2.9                                                                           | 5.8                                                                           | 2.7                                                                         |
| Average maximum height of profile (nm)       | 5.3                                                         | 11.1                                                                          | 23.4                                                                          | 12.2                                                                        |
| Average maximum height of the roughness (nm) | 5.3                                                         | 9.8                                                                           | 21.5                                                                          | 10.4                                                                        |
| Maximum height of the profile (nm)           | 96.2                                                        | 159.3                                                                         | 226.0                                                                         | 65.2                                                                        |
| Thickness ( $\mu\text{m}$ )                  | 0.24                                                        | 0.27                                                                          | 0.57                                                                          | 0.27                                                                        |

**Table S3.** Comparison of performance of various nitrite sensors

| <b>Electrodes</b>                                    | <b>Linear range (<math>\mu\text{M}</math>)</b> | <b>LOD (<math>\mu\text{M}</math>)</b> | <b>Reference</b> |
|------------------------------------------------------|------------------------------------------------|---------------------------------------|------------------|
| Fe(III)P/MWCNTs/GCE                                  | 1–600                                          | 0.5                                   | [1]              |
| CR-GO/GCE                                            | 8.9–167                                        | 1.0                                   | [2]              |
| Pt/Fe(III) nanoparticle                              | 1.1–11,000                                     | 0.47                                  | [3]              |
| Thionine modified aligned carbon nanotubes electrode | 3–500                                          | 1.12                                  | [4]              |
| Au/Fe(III) nanoparticle modified GCE                 | 0.3–150                                        | 0.20                                  | [5]              |
| CME/GC–Ru(III)–BSAP–PLA                              | 0–159                                          | 1.81                                  | [6]              |
| poly(oanisidine)/ IL-CPE                             | 2–50                                           | 1.05                                  | [7]              |
| EPPGE–SWCNT–Co                                       | 0–189                                          | 5.61                                  | [8]              |
| p-duroquinone / CPE                                  | 6–400                                          | 4.3                                   | [9]              |
| GCE                                                  | 2.5–10                                         | 0.40                                  | [10]             |
| Au-penicillamine SAM                                 | 20–800                                         | 4.0                                   | [11]             |
| MgO <sub>2</sub> /CCE                                | 0–200                                          | 0.60                                  | [12]             |
| Pd-nanostructures/CNTs                               | 2–238                                          | 0.25                                  | [13]             |
| PPy/SDS/f-MWCNTs                                     | 3–1120                                         | 0.11                                  | Present study    |

## References

- 1 C. Wang, R. Yuan, Y. Q. Chai, S. H. Chen, Y. Zhang, F. X. Hu and M. H. Zhang, *Electrochim. Acta*, 2012, 62, 109-115.
- 2 V. Mani, A. P. Periasamy and S. M. Chen, *Electrochem. Commun.*, 2012, 17, 75-78.
- 3 S. Q. Wang, Y. M. Yin and X. Q. Lin, *Electrochem. Commun.*, 2004, 6, 259-262.

- 4 K. Zhao, H. Song, S. Zhuang, L. Dai, P. He and Y. Fang, *Electrochem. Commun.*, 2007, 9, 65-70.
- 5 T. S. Liu, T. F. Kang, L. P. Lu, Y. Zhang and S. Y. Cheng, *J. Electroanal. Chem.*, 2009, 632, 197-200.
- 6 A. Terbouche, C. A. R. Terbouche, S. Djebbar, D. Guerniche, R. Bagtache, N. E. Houda, A. Saal and D. Hauchard, *J. Molecular Str.*, 2014, 1076, 501-511.
- 7 R. Ojani, J. B. Raoof and S. Zamani, *App. Sur. Sci.*, 2013, 271, 98-104.
- 8 A. S. Adekunle, J. Pillay and K. I. Ozoemena, *Electrochim. Acta*, 2010, 55, 4319-4327.
- 9 J. B. Raoof, R. Ojani and M. Ramine, *J. Solid State Electrochem.*, 2009, 13, 1311-1319.
- 10 B. Kozub, N. Rees, R. Compton, *Sens. Actuators B*, 2010, 143, 539-546.
- 11 Q. Wang, D. Dong and N. Li, *Bioelectrochem.*, 2001, 54, 169-175.
- 12 B. Sljukic and R.G. Compton, *Electroanalysis*, 2007, 19, 1275-1280.
- 13 X. H. Pham, C. A. Li, K. N. Han, B. C. Huynh-Nguyen, T. H. Li, E. Ko, J. H. Kim and G. H. Seong, *Sens. Actuators B*, 2014, 193, 815-822.
